# Supplementary material for: Deciphering the Polyglucosan Accumulation Present in Lafora Disease Using an Astrocytic Cellular Model
Source: MDPI journal article supplement (doi:10.3390/ijms24076020), 2023-03-23
Supplement: s1 [file s1]

### Supplementary Table S1

Full list of the differential changes in the levels of intermediate metabolites in control and *Epm2b*<sup>-/-</sup> astrocytes growing in DMEM + 10% FBS medium with no extra glucose added for 24 h. The fold change and the p-values are indicated (n=4). Values are arranged according to FC. \*Indicates a compound that has not been confirmed based on a standard, but we are confident in its identity. \*\*Indicates a compound for which a standard is not available, but we are reasonably confident in its identity or the information provided.

| Metabolite                                                                       | FC <i>Epm2b</i> <sup>-/-</sup><br>Control | p value <i>Epm2b</i> <sup>-/-</sup><br>Control |
|----------------------------------------------------------------------------------|-------------------------------------------|------------------------------------------------|
| fructose 1,6-diphosphate/glucose<br>1,6-diphosphate/myo-inositol<br>diphosphates | 5,19                                      | 0,023                                          |
| glucose 6-phosphate                                                              | 3,77                                      | 0,023                                          |
| glucosamine-6-phosphate                                                          | 3,22                                      | 0,417                                          |
| fructose-6-phosphate                                                             | 2,56                                      | 0,596                                          |
| dihydroxyacetone phosphate<br>(DHAP)                                             | 2,44                                      | 0,192                                          |
| aconitate [cis or trans]                                                         | 2,40                                      | 0,195                                          |
| dihomo-linoleoylcarnitine (C20:2)*                                               | 2,28                                      | 0,185                                          |
| gluconate                                                                        | 2,27                                      | 0,063                                          |
| N-carbamoylaspartate                                                             | 2,25                                      | 0,323                                          |
| 6-phosphogluconate                                                               | 2,18                                      | 0,336                                          |
| 1-ribosyl-imidazoleacetate*                                                      | 2,08                                      | 0,027                                          |
| citrate                                                                          | 1,90                                      | 0,243                                          |
| adenosine-5'-diphosphoglucose                                                    | 1,88                                      | 0,285                                          |
| glucose                                                                          | 1,87                                      | 0,247                                          |
| nisinate (24:6n3)                                                                | 1,70                                      | 0,652                                          |
| 1-arachidonoyl-GPC (20:4n6)*                                                     | 1,68                                      | 0,544                                          |
| 2'-deoxyguanosine                                                                | 1,66                                      | 0,079                                          |
| 2-stearoyl-GPE (18:0)*                                                           | 1,65                                      | 0,682                                          |
| orotate                                                                          | 1,62                                      | 0,478                                          |
| N-stearoyltaurine                                                                | 1,62                                      | 0,554                                          |
| cerotoylcarnitine (C26)*                                                         | 1,56                                      | 0,265                                          |
| N-oleoyltaurine                                                                  | 1,55                                      | 0,657                                          |
| sedoheptulose-7-phosphate                                                        | 1,54                                      | 0,113                                          |
| mannose                                                                          | 1,54                                      | 0,247                                          |
| isovalerylcarnitine (C5)                                                         | 1,54                                      | 0,519                                          |
| erucate (22:1n9)                                                                 | 1,54                                      | 0,571                                          |
| 1-arachidonoyl-GPE (20:4n6)*                                                     | 1,53                                      | 0,554                                          |
| 2'-deoxyinosine                                                                  | 1,52                                      | 0,170                                          |
| glutathione, oxidized (GSSG)                                                     | 1,48                                      | 0,261                                          |
| acetylphosphate                                                                  | 1,48                                      | 0,422                                          |

|                                               |      |       |
|-----------------------------------------------|------|-------|
| inositol 1-phosphate (I1P)                    | 1,48 | 0,622 |
| adenosine 5'-diphosphate (ADP)                | 1,47 | 0,700 |
| 4-methyl-2-oxopentanoate                      | 1,46 | 0,344 |
| eicosapentaenoate (EPA; 20:5n3)               | 1,46 | 0,654 |
| phosphoenolpyruvate (PEP)                     | 1,43 | 0,455 |
| 1-stearoyl-2-docosahexaenoyl-GPE (18:0/22:6)* | 1,42 | 0,212 |
| 2-hydroxypalmitate                            | 1,42 | 0,364 |
| myristate (14:0)                              | 1,42 | 0,409 |
| 2-methylbutyrylcarnitine (C5)                 | 1,42 | 0,586 |
| palmitoyl ethanolamide                        | 1,42 | 0,772 |
| dihomo-linoleate (20:2n6)                     | 1,40 | 0,723 |
| N-acetylglucosamine/N-acetylgalactosamine     | 1,39 | 0,356 |
| linoleoyl ethanolamide                        | 1,39 | 0,982 |
| 1-oleoyl-GPS (18:1)                           | 1,37 | 0,687 |
| heneicosapentaenoate (21:5n3)                 | 1,37 | 0,767 |
| docosatrienoate (22:3n6)*                     | 1,37 | 0,830 |
| docosadienoate (22:2n6)                       | 1,37 | 0,935 |
| 2-palmitoyl-GPC (16:0)*                       | 1,36 | 0,782 |
| aspartate                                     | 1,35 | 0,193 |
| docosahexaenoate (DHA; 22:6n3)                | 1,35 | 0,652 |
| glucuronate                                   | 1,34 | 0,134 |
| 2-hydroxystearate                             | 1,34 | 0,428 |
| 1-stearoyl-GPS (18:0)*                        | 1,34 | 0,656 |
| 1-oleoyl-GPG (18:1)*                          | 1,34 | 0,823 |
| 3-formylindole                                | 1,33 | 0,256 |
| galactose 1-phosphate                         | 1,33 | 0,329 |
| docosapentaenoate (n3 DPA; 22:5n3)            | 1,33 | 0,791 |
| eicosenoate (20:1)                            | 1,33 | 0,801 |
| 1-palmitoyl-GPS (16:0)*                       | 1,32 | 0,617 |
| palmitoleate (16:1n7)                         | 1,32 | 0,705 |
| arachidonate (20:4n6)                         | 1,32 | 0,732 |
| nicotinamide riboside                         | 1,31 | 0,155 |
| 2-oxoarginine*                                | 1,31 | 0,210 |
| sedoheptulose                                 | 1,31 | 0,242 |
| oleoyl ethanolamide                           | 1,31 | 0,928 |
| heptadecasphingosine (d17:1)                  | 1,30 | 0,266 |
| 3-phosphoglycerate                            | 1,30 | 0,569 |
| stearate (18:0)                               | 1,29 | 0,541 |
| 5-hydroxyindoleacetate                        | 1,29 | 0,755 |
| mead acid (20:3n9)                            | 1,29 | 0,770 |
| 1-palmitoyl-GPG (16:0)*                       | 1,29 | 0,780 |

|                                                     |      |       |
|-----------------------------------------------------|------|-------|
| 1-stearoyl-GPI (18:0)                               | 1,29 | 0,897 |
| glycerate                                           | 1,28 | 0,672 |
| 1-palmitoylglycerol (16:0)                          | 1,28 | 0,683 |
| pentadecanoate (15:0)                               | 1,27 | 0,567 |
| margarate (17:0)                                    | 1,27 | 0,668 |
| 10-nonadecenoate (19:1n9)                           | 1,27 | 0,810 |
| 3-sialyllactose                                     | 1,27 | 0,828 |
| nonadecanoate (19:0)                                | 1,27 | 0,838 |
| valylglycine                                        | 1,26 | 0,249 |
| N-acetylglucosaminylasparagine                      | 1,26 | 0,338 |
| adrenate (22:4n6)                                   | 1,26 | 0,888 |
| tauroolithocholate                                  | 1,25 | 0,628 |
| ribose                                              | 1,24 | 0,182 |
| glycosyl-N-palmitoyl-sphingosine (d18:1/16:0)       | 1,24 | 0,202 |
| 1-palmitoleoyl-2-oleoyl-GPC (16:1/18:1)*            | 1,24 | 0,326 |
| 1,2-dioleoyl-GPI (18:1/18:1)                        | 1,24 | 0,358 |
| spermine                                            | 1,24 | 0,425 |
| isoleucylglycine                                    | 1,23 | 0,279 |
| 3-hydroxyadipate*                                   | 1,23 | 0,363 |
| guanosine 5'-diphospho-fucose                       | 1,23 | 0,404 |
| (S)-3-hydroxybutyrylcarnitine                       | 1,23 | 0,411 |
| glycylleucine                                       | 1,22 | 0,361 |
| pterin                                              | 1,22 | 0,384 |
| succinylcarnitine (C4-DC)                           | 1,22 | 0,446 |
| 10-heptadecenoate (17:1n7)                          | 1,22 | 0,778 |
| N-monomethylarginine                                | 1,21 | 0,215 |
| fumarate                                            | 1,21 | 0,331 |
| fructosyllysine                                     | 1,21 | 0,421 |
| 2-palmitoylglycerol (16:0)                          | 1,21 | 0,784 |
| glutathione, reduced (GSH)                          | 1,20 | 0,261 |
| 1-(1-enyl-palmitoyl)-2-linoleoyl-GPE (P-16:0/18:2)* | 1,20 | 0,376 |
| 1-(1-enyl-palmitoyl)-2-linoleoyl-GPC (P-16:0/18:2)* | 1,20 | 0,507 |
| isobutyrylcarnitine (C4)                            | 1,20 | 0,610 |
| 1-linoleoyl-GPE (18:2)*                             | 1,20 | 0,706 |
| dihomo-linolenate (20:3n3 or n6)                    | 1,20 | 0,834 |
| cytosine                                            | 1,20 | 0,867 |
| glycerophosphoserine*                               | 1,19 | 0,260 |
| S-(1,2-dicarboxyethyl)glutathione                   | 1,19 | 0,283 |
| UDP-glucose                                         | 1,19 | 0,289 |
| N6,N6-dimethyllysine                                | 1,19 | 0,430 |
| 1-(1-enyl-palmitoyl)-2-oleoyl-GPC                   | 1,19 | 0,556 |

|                                                     |      |       |
|-----------------------------------------------------|------|-------|
| (P-16:0/18:1)*                                      |      |       |
| biopterin                                           | 1,19 | 0,686 |
| 3-hydroxypalmitoylcarnitine                         | 1,19 | 0,794 |
| methylsuccinate                                     | 1,18 | 0,246 |
| adenine                                             | 1,18 | 0,382 |
| sphingosine                                         | 1,18 | 0,437 |
| 1,2-dilinoleoyl-GPC (18:2/18:2)                     | 1,18 | 0,506 |
| ophthalmate                                         | 1,18 | 0,608 |
| glycerophosphorylcholine (GPC)                      | 1,18 | 0,684 |
| creatinine                                          | 1,18 | 0,708 |
| 1-oleoyl-GPI (18:1)                                 | 1,18 | 0,899 |
| N-acetyltaurine                                     | 1,17 | 0,422 |
| 1-palmitoleoyl-2-oleoyl-GPE (16:1/18:1)*            | 1,17 | 0,434 |
| pyridoxamine                                        | 1,17 | 0,466 |
| 1,2-dipalmitoyl-GPE (16:0/16:0)*                    | 1,17 | 0,635 |
| pyridoxamine phosphate                              | 1,17 | 0,760 |
| argininosuccinate                                   | 1,16 | 0,313 |
| glycosyl-N-nervonoyl-sphingosine (d18:1/24:1)*      | 1,16 | 0,347 |
| inosine                                             | 1,16 | 0,351 |
| sphingomyelin (d18:2/24:2)*                         | 1,16 | 0,630 |
| 4-hydroxyglutamate                                  | 1,16 | 0,668 |
| N-glycolylneuraminate                               | 1,15 | 0,356 |
| 2R,3R-dihydroxybutyrate                             | 1,15 | 0,474 |
| guanosine                                           | 1,15 | 0,532 |
| 1-palmitoleoyl-2-linoleoyl-GPC (16:1/18:2)*         | 1,15 | 0,607 |
| ceramide (d18:1/14:0, d16:1/16:0)*                  | 1,15 | 0,772 |
| alpha-tocopherol                                    | 1,15 | 0,998 |
| sphingomyelin (d18:1/22:2, d18:2/22:1, d16:1/24:2)* | 1,14 | 0,295 |
| glycylvaline                                        | 1,14 | 0,356 |
| 3-hydroxy-3-methylglutarate                         | 1,14 | 0,361 |
| N6-succinyladenosine                                | 1,14 | 0,516 |
| dihydrobiopterin                                    | 1,14 | 0,699 |
| 1-stearoyl-2-oleoyl-GPE (18:0/18:1)                 | 1,14 | 0,774 |
| 1-margaroylglycerol (17:0)                          | 1,14 | 0,807 |
| thymidine                                           | 1,13 | 0,385 |
| 2-dimethylaminoethanol                              | 1,13 | 0,400 |
| xanthosine 5'-monophosphate (xmp)                   | 1,13 | 0,470 |
| glycylisoleucine                                    | 1,13 | 0,482 |
| 1-palmitoyl-2-oleoyl-GPG (16:0/18:1)                | 1,13 | 0,594 |
| 1-(1-enyl-palmitoyl)-2-palmitoleoyl-                | 1,13 | 0,614 |

|                                                        |      |       |
|--------------------------------------------------------|------|-------|
| GPC (P-16:0/16:1)*                                     |      |       |
| flavin mononucleotide (FMN)                            | 1,13 | 0,897 |
| S-methylglutathione                                    | 1,12 | 0,469 |
| 1-oleoyl-2-linoleoyl-GPE (18:1/18:2)*                  | 1,12 | 0,566 |
| 7-hydroxycholesterol (alpha or beta)                   | 1,12 | 0,576 |
| 1-(1-enyl-palmitoyl)-2-palmitoyl-GPC (P-16:0/16:0)*    | 1,12 | 0,580 |
| 1-(1-enyl-palmitoyl)-2-arachidonoyl-GPE (P-16:0/20:4)* | 1,12 | 0,651 |
| glycosyl ceramide (d18:1/20:0, d16:1/22:0)*            | 1,12 | 0,710 |
| 1,2-dioleoyl-GPG (18:1/18:1)                           | 1,12 | 0,809 |
| (16 or 17)-methylstearate (a19:0 or i19:0)             | 1,12 | 0,976 |
| uridine                                                | 1,11 | 0,303 |
| glutarate (C5-DC)                                      | 1,11 | 0,503 |
| glutamate                                              | 1,11 | 0,519 |
| 3-hydroxydecanoylcarnitine                             | 1,11 | 0,525 |
| caproate (6:0)                                         | 1,11 | 0,665 |
| phosphoethanolamine                                    | 1,11 | 0,669 |
| 1-palmitoyl-2-gamma-linolenoyl-GPC (16:0/18:3n6)*      | 1,11 | 0,695 |
| beta-guanidinopropanoate                               | 1,11 | 0,833 |
| 1-pentadecanoylglycerol (15:0)                         | 1,11 | 0,966 |
| pipecolate                                             | 1,10 | 0,316 |
| tryptophan                                             | 1,10 | 0,349 |
| asparagine                                             | 1,10 | 0,400 |
| N6-acetyllysine                                        | 1,10 | 0,549 |
| prolylglycine                                          | 1,10 | 0,553 |
| sphinganine                                            | 1,10 | 0,621 |
| 1-docosaehaenoylglycerol (22:6)                        | 1,10 | 0,627 |
| 5-methylthioadenosine (MTA)                            | 1,10 | 0,630 |
| 3-hydroxyhexanoylcarnitine (1)                         | 1,10 | 0,651 |
| 1-(1-enyl-stearoyl)-2-arachidonoyl-GPE (P-18:0/20:4)*  | 1,10 | 0,824 |
| ceramide (d16:1/24:1, d18:1/22:1)*                     | 1,10 | 0,838 |
| ceramide (d18:1/20:0, d16:1/22:0, d20:1/18:0)*         | 1,10 | 0,954 |
| taurine                                                | 1,09 | 0,434 |
| lactosyl-N-palmitoyl-sphingosine (d18:1/16:0)          | 1,09 | 0,492 |
| guanidinoacetate                                       | 1,09 | 0,657 |
| 1-oleoyl-2-arachidonoyl-GPI (18:1/20:4)*               | 1,09 | 0,682 |
| 1-(1-enyl-stearoyl)-2-oleoyl-GPE (P-18:0/18:1)         | 1,09 | 0,783 |

|                                                                 |      |       |
|-----------------------------------------------------------------|------|-------|
| N-palmitoyl-sphingosine (d18:1/16:0)                            | 1,09 | 0,959 |
| alanine                                                         | 1,08 | 0,428 |
| histidine                                                       | 1,08 | 0,510 |
| gulonate*                                                       | 1,08 | 0,538 |
| lactosyl-N-nervonoyl-sphingosine (d18:1/24:1)*                  | 1,08 | 0,542 |
| nicotinamide                                                    | 1,08 | 0,586 |
| malate                                                          | 1,08 | 0,591 |
| lactosyl-N-behenoyl-sphingosine (d18:1/22:0)*                   | 1,08 | 0,643 |
| 1-palmitoyl-2-arachidonoyl-GPI (16:0/20:4)*                     | 1,08 | 0,649 |
| benzoate                                                        | 1,08 | 0,673 |
| tryptophylglycine                                               | 1,08 | 0,752 |
| hexadecasphingosine (d16:1)*                                    | 1,08 | 0,791 |
| 1-stearoyl-2-arachidonoyl-GPC (18:0/20:4)                       | 1,08 | 0,881 |
| (14 or 15)-methylpalmitate (a17:0 or i17:0)                     | 1,08 | 0,908 |
| N-palmitoyl-sphingadienine (d18:2/16:0)*                        | 1,08 | 0,916 |
| 1-(1-enyl-stearoyl)-GPE (P-18:0)*                               | 1,08 | 0,934 |
| 1-arachidonoyl-GPI (20:4)*                                      | 1,08 | 0,943 |
| 1-palmitoyl-GPI (16:0)                                          | 1,08 | 0,978 |
| taurochenodeoxycholate                                          | 1,08 | 0,979 |
| serine                                                          | 1,07 | 0,452 |
| methionine                                                      | 1,07 | 0,492 |
| sphingomyelin (d18:2/23:1)*                                     | 1,07 | 0,655 |
| tyrosylglycine                                                  | 1,07 | 0,671 |
| sphingomyelin (d17:1/16:0, d18:1/15:0, d16:1/17:0)*             | 1,07 | 0,682 |
| sphingomyelin (d18:2/21:0, d16:2/23:0)*                         | 1,07 | 0,691 |
| trigonelline (N'-methylnicotinate)                              | 1,07 | 0,696 |
| gamma-glutamylglutamate                                         | 1,07 | 0,698 |
| cytidine 5'-diphosphocholine                                    | 1,07 | 0,723 |
| 1-palmitoyl-2-oleoyl-GPE (16:0/18:1)                            | 1,07 | 0,732 |
| pantothenate                                                    | 1,07 | 0,737 |
| phytosphingosine                                                | 1,07 | 0,756 |
| 1-(1-enyl-palmitoyl)-2-oleoyl-GPE (P-16:0/18:1)*                | 1,07 | 0,758 |
| 1,2-dioleoyl-GPC (18:1/18:1)                                    | 1,07 | 0,772 |
| 1-stearoyl-2-docosahexaenoyl-GPC (18:0/22:6)                    | 1,07 | 0,868 |
| sphingomyelin (d18:1/25:0, d19:0/24:1, d20:1/23:0, d19:1/24:0)* | 1,07 | 0,888 |

|                                                        |      |       |
|--------------------------------------------------------|------|-------|
| 1-stearoyl-GPG (18:0)                                  | 1,07 | 0,943 |
| tyrosine                                               | 1,06 | 0,565 |
| 5-(2-Hydroxyethyl)-4-methylthiazole                    | 1,06 | 0,570 |
| pyridoxate                                             | 1,06 | 0,572 |
| carnitine                                              | 1,06 | 0,589 |
| guanine                                                | 1,06 | 0,629 |
| choline phosphate                                      | 1,06 | 0,639 |
| 1-palmitoyl-2-arachidonoyl-GPE (16:0/20:4)*            | 1,06 | 0,699 |
| 1,2-dioleoyl-GPE (18:1/18:1)                           | 1,06 | 0,753 |
| 3'-dephospho-CoA-glutathione*                          | 1,06 | 0,775 |
| ergothioneine                                          | 1,06 | 0,801 |
| behenoyl sphingomyelin (d18:1/22:0)*                   | 1,06 | 0,824 |
| lignoceroyl sphingomyelin (d18:1/24:0)                 | 1,06 | 0,840 |
| 1-(1-enyl-palmitoyl)-2-arachidonoyl-GPC (P-16:0/20:4)* | 1,06 | 0,891 |
| glycochenodeoxycholate                                 | 1,06 | 0,945 |
| lactose                                                | 1,06 | 0,984 |
| threonine                                              | 1,05 | 0,527 |
| proline                                                | 1,05 | 0,607 |
| arginine                                               | 1,05 | 0,618 |
| phenylalanine                                          | 1,05 | 0,620 |
| lysine                                                 | 1,05 | 0,635 |
| spermidine                                             | 1,05 | 0,689 |
| isoleucine                                             | 1,05 | 0,707 |
| uridine 5'-monophosphate (UMP)                         | 1,05 | 0,763 |
| 1-palmitoyl-2-palmitoleoyl-GPC (16:0/16:1)*            | 1,05 | 0,790 |
| hypotaurine                                            | 1,05 | 0,806 |
| pyridoxal                                              | 1,05 | 0,816 |
| 1-oleoyl-2-docosahexaenoyl-GPC (18:1/22:6)*            | 1,05 | 0,842 |
| N('1)-acetylspermidine                                 | 1,05 | 0,862 |
| succinate                                              | 1,05 | 0,934 |
| 1-stearoyl-2-arachidonoyl-GPE (18:0/20:4)              | 1,05 | 0,941 |
| margaroylcarnitine (C17)*                              | 1,05 | 0,958 |
| 1-myristoyl-2-arachidonoyl-GPC (14:0/20:4)*            | 1,05 | 0,983 |
| 1-(1-enyl-palmitoyl)-GPE (P-16:0)*                     | 1,05 | 0,997 |
| creatine                                               | 1,04 | 0,631 |
| deoxycarnitine                                         | 1,04 | 0,667 |
| glycerophosphoinositol*                                | 1,04 | 0,669 |
| gamma-glutamyl-epsilon-lysine                          | 1,04 | 0,676 |
| leucine                                                | 1,04 | 0,724 |

|                                               |      |       |
|-----------------------------------------------|------|-------|
| 5-(galactosylhydroxy)-L-lysine                | 1,04 | 0,740 |
| butyrate (4:0)                                | 1,04 | 0,771 |
| fructose                                      | 1,04 | 0,837 |
| glycerophosphoglycerol                        | 1,04 | 0,841 |
| 1-myristoyl-2-palmitoyl-GPC (14:0/16:0)       | 1,04 | 0,876 |
| pantetheine                                   | 1,04 | 0,977 |
| putrescine                                    | 1,04 | 0,985 |
| creatine phosphate                            | 1,04 | 0,989 |
| inosine 5'-monophosphate (IMP)                | 1,03 | 0,656 |
| myo-inositol                                  | 1,03 | 0,731 |
| 1-palmitoyl-2-oleoyl-GPS (16:0/18:1)          | 1,03 | 0,770 |
| cysteinylglycine                              | 1,03 | 0,784 |
| 1-(1-enyl-oleoyl)-2-oleoyl-GPE (P-18:1/18:1)* | 1,03 | 0,787 |
| N-acetylmethionine                            | 1,03 | 0,800 |
| phenylalanylglycine                           | 1,03 | 0,832 |
| 3-hydroxyoleoylcarnitine                      | 1,03 | 0,886 |
| 1-oleoyl-2-docosahexaenoyl-GPE (18:1/22:6)*   | 1,03 | 0,886 |
| 1-(1-enyl-oleoyl)-GPE (P-18:1)*               | 1,03 | 0,890 |
| N-behenoyl-sphingadienine (d18:2/22:0)*       | 1,03 | 0,902 |
| N-nervonoyl-sphingadiene (d18:2/24:1)*        | 1,03 | 0,904 |
| thiamin (Vitamin B1)                          | 1,03 | 0,906 |
| glycerophosphoethanolamine                    | 1,03 | 0,978 |
| sphingomyelin (d18:2/18:1)*                   | 1,02 | 0,714 |
| glycerol                                      | 1,02 | 0,748 |
| phenol glucuronide                            | 1,02 | 0,768 |
| phenol red                                    | 1,02 | 0,817 |
| valine                                        | 1,02 | 0,818 |
| 2-hydroxyadipate                              | 1,02 | 0,822 |
| palmitoylcarnitine (C16)                      | 1,02 | 0,830 |
| palmitoyl dihydrosphingomyelin (d18:0/16:0)*  | 1,02 | 0,830 |
| 1,2-dipalmitoyl-GPC (16:0/16:0)               | 1,02 | 0,837 |
| 1-methylnicotinamide                          | 1,02 | 0,885 |
| ribonate                                      | 1,02 | 0,893 |
| 4-hydroxy-nonenal-glutathione                 | 1,02 | 0,938 |
| 1-palmitoyl-2-stearoyl-GPC (16:0/18:0)        | 1,02 | 0,943 |
| dimethylarginine (SDMA + ADMA)                | 1,02 | 0,951 |
| methylmalonate (MMA)                          | 1,02 | 0,963 |
| alpha-ketoglutarate                           | 1,02 | 0,963 |
| 1-stearoyl-2-oleoyl-GPS (18:0/18:1)           | 1,02 | 0,979 |



|                                                    |      |       |
|----------------------------------------------------|------|-------|
| glycosyl-N-stearoyl-sphingosine (d18:1/18:0)       | 1,02 | 0,994 |
| S-1-pyrroline-5-carboxylate                        | 1,01 | 0,693 |
| 1-stearoyl-GPE (18:0)                              | 1,01 | 0,708 |
| 1-palmitoleoyl-GPC (16:1)*                         | 1,01 | 0,730 |
| 1-oleoyl-GPC (18:1)                                | 1,01 | 0,761 |
| saccharopine                                       | 1,01 | 0,762 |
| cytidine 5'-monophosphate (5'-CMP)                 | 1,01 | 0,814 |
| phosphate                                          | 1,01 | 0,822 |
| gamma-glutamylmethionine                           | 1,01 | 0,827 |
| N-acetylserine                                     | 1,01 | 0,874 |
| tiglylcarnitine (C5:1-DC)                          | 1,01 | 0,875 |
| methionine sulfoxide                               | 1,01 | 0,896 |
| ribitol                                            | 1,01 | 0,939 |
| 1-methyl-5-imidazoleacetate                        | 1,01 | 0,941 |
| (R)-3-hydroxybutyrylcarnitine                      | 1,01 | 0,942 |
| stearoyl-docosahexaenoyl-glycerol (18:0/22:6) [2]* | 1,01 | 0,948 |
| 1-palmitoyl-2-docosahexaenoyl-GPC (16:0/22:6)      | 1,01 | 0,950 |
| S-methylcysteine                                   | 1,01 | 0,958 |
| sphingomyelin (d18:1/14:0, d16:1/16:0)*            | 1,01 | 0,975 |
| 1-palmitoyl-2-arachidonoyl-GPC (16:0/20:4n6)       | 1,01 | 0,978 |
| nicotinamide ribonucleotide (NMN)                  | 1,01 | 0,983 |
| 1-oleoyl-2-arachidonoyl-GPE (18:1/20:4)*           | 1,01 | 0,993 |
| 1-oleoyl-GPE (18:1)                                | 1,00 | 0,755 |
| nicotinamide adenine dinucleotide (NAD+)           | 1,00 | 0,780 |
| 1-palmitoyl-GPE (16:0)                             | 1,00 | 0,790 |
| hypoxanthine                                       | 1,00 | 0,851 |
| cytidine                                           | 1,00 | 0,869 |
| S-methylmethionine                                 | 1,00 | 0,887 |
| O-methyltyrosine                                   | 1,00 | 0,918 |
| cholesterol                                        | 1,00 | 0,931 |
| sphingomyelin (d18:1/20:0, d16:1/22:0)*            | 1,00 | 0,934 |
| N,N,N-trimethyl-5-aminovalerate                    | 1,00 | 0,942 |
| 3-methyl-2-oxovalerate                             | 1,00 | 0,945 |
| N-acetylalanine                                    | 1,00 | 0,950 |
| sphingomyelin (d18:2/16:0, d18:1/16:1)*            | 1,00 | 0,982 |
| sphingomyelin (d18:2/24:1, d18:1/24:2)*            | 1,00 | 0,986 |
| 1-carboxyethylleucine                              | 1,00 | 0,988 |

|                                                              |      |       |
|--------------------------------------------------------------|------|-------|
| 1-stearoyl-2-arachidonoyl-GPS<br>(18:0/20:4)                 | 1,00 | 0,997 |
| 1-palmitoyl-2-oleoyl-GPC<br>(16:0/18:1)                      | 1,00 | 0,999 |
| mannose-6-phosphate                                          | 1,00 | 1,000 |
| ribulose/xylulose                                            | 1,00 | 1,000 |
| 1-palmitoyl-2-docosahexaenoyl-<br>glycosyl-GPE (16:0/22:6)** | 1,00 | 1,000 |
| adenosine 2'-monophosphate (2'-<br>AMP)                      | 1,00 | 1,000 |
| pinosylvin monomethylether                                   | 1,00 | 1,000 |
| 4-hydroxyphenylpyruvate                                      | 0,99 | 0,730 |
| glycerol 3-phosphate                                         | 0,99 | 0,822 |
| 1-stearoyl-2-arachidonoyl-GPI<br>(18:0/20:4)                 | 0,99 | 0,868 |
| beta-alanine                                                 | 0,99 | 0,886 |
| N-acetylneuraminate                                          | 0,99 | 0,896 |
| 1-carboxyethylphenylalanine                                  | 0,99 | 0,899 |
| 1-myristoylglycerol (14:0)                                   | 0,99 | 0,916 |
| 2'-deoxyuridine                                              | 0,99 | 0,917 |
| N6-carbamoylthreonyladenosine                                | 0,99 | 0,918 |
| 4-guanidinobutanoate                                         | 0,99 | 0,926 |
| choline                                                      | 0,99 | 0,928 |
| 1-palmitoyl-2-docosahexaenoyl-<br>GPE (16:0/22:6)*           | 0,99 | 0,933 |
| S-adenosylmethionine (SAM)                                   | 0,99 | 0,943 |
| 3-methylcytidine                                             | 0,99 | 0,943 |
| cysteine sulfinic acid                                       | 0,99 | 0,944 |
| gamma-glutamylserine                                         | 0,99 | 0,949 |
| gamma-glutamylalanine                                        | 0,99 | 0,949 |
| sphingomyelin (d18:1/20:1,<br>d18:2/20:0)*                   | 0,99 | 0,954 |
| N1-methyladenosine                                           | 0,99 | 0,967 |
| S-adenosylhomocysteine (SAH)                                 | 0,99 | 0,970 |
| behenoylcarnitine (C22)*                                     | 0,99 | 0,976 |
| erythronate*                                                 | 0,99 | 0,996 |
| CoA-glutathione*                                             | 0,98 | 0,509 |
| 1-lignoceroyl-GPC (24:0)                                     | 0,98 | 0,596 |
| 1-(1-enyl-palmitoyl)-GPC (P-16:0)*                           | 0,98 | 0,631 |
| cysteine-glutathione disulfide                               | 0,98 | 0,691 |
| sphingomyelin (d17:1/14:0,<br>d16:1/15:0)*                   | 0,98 | 0,736 |
| guanosine 5'- monophosphate (5'-<br>GMP)                     | 0,98 | 0,759 |
| 6-oxopiperidine-2-carboxylate                                | 0,98 | 0,764 |
| 2-aminoheptanoate                                            | 0,98 | 0,766 |
| arachidonoylcarnitine (C20:4)                                | 0,98 | 0,825 |

|                                                     |      |       |
|-----------------------------------------------------|------|-------|
| 1-palmitoyl-2-linoleoyl-GPC (16:0/18:2)             | 0,98 | 0,866 |
| myristoyl dihydrosphingomyelin (d18:0/14:0)*        | 0,98 | 0,902 |
| gamma-glutamyltryptophan                            | 0,98 | 0,912 |
| 2'-deoxycytidine                                    | 0,98 | 0,916 |
| 1,2-dioleoyl-GPS (18:1/18:1)                        | 0,98 | 0,947 |
| thioprolin                                          | 0,98 | 0,968 |
| orotidine                                           | 0,98 | 0,969 |
| N-acetylleucine                                     | 0,98 | 0,998 |
| flavin adenine dinucleotide (FAD)                   | 0,97 | 0,677 |
| 1-arachidonylglycerol (20:4)                        | 0,97 | 0,681 |
| 1-stearoyl-2-oleoyl-GPC (18:0/18:1)                 | 0,97 | 0,756 |
| phenyllactate (PLA)                                 | 0,97 | 0,794 |
| tricosanoyl sphingomyelin (d18:1/23:0)*             | 0,97 | 0,838 |
| N-formylmethionine                                  | 0,97 | 0,859 |
| sphingomyelin (d18:2/23:0, d18:1/23:1, d17:1/24:1)* | 0,97 | 0,864 |
| 1-carboxyethylisoleucine                            | 0,97 | 0,890 |
| glutamine                                           | 0,97 | 0,891 |
| allantoin                                           | 0,97 | 0,893 |
| beta-citrylglutamate                                | 0,97 | 0,915 |
| N6,N6,N6-trimethyllysine                            | 0,97 | 0,934 |
| imidazole propionate                                | 0,97 | 0,943 |
| C-glycosyltryptophan                                | 0,97 | 0,945 |
| 1-carboxyethylvaline                                | 0,97 | 0,949 |
| palmitoyl sphingomyelin (d18:1/16:0)                | 0,97 | 0,949 |
| hydroxy-N6,N6,N6-trimethyllysine*                   | 0,97 | 0,953 |
| sphingomyelin (d18:1/22:1, d18:2/22:0, d16:1/24:1)* | 0,97 | 0,966 |
| carnosine                                           | 0,97 | 0,992 |
| N-stearoyl-sphingosine (d18:1/18:0)*                | 0,96 | 0,649 |
| oleoylcarnitine (C18:1)                             | 0,96 | 0,670 |
| 3-hydroxymyristate                                  | 0,96 | 0,681 |
| 3-methyl-2-oxobutyrate                              | 0,96 | 0,704 |
| N-stearoyl-sphingadienine (d18:2/18:0)*             | 0,96 | 0,716 |
| sphingomyelin (d18:1/21:0, d17:1/22:0, d16:1/23:0)* | 0,96 | 0,716 |
| N-palmitoyl-sphinganine (d18:0/16:0)                | 0,96 | 0,733 |
| sphingomyelin (d18:1/19:0, d19:1/18:0)*             | 0,96 | 0,759 |
| gamma-glutamylthreonine                             | 0,96 | 0,834 |
| 3-hydroxyoctanoate                                  | 0,96 | 0,837 |

|                                                    |      |       |
|----------------------------------------------------|------|-------|
| 2-methylmalonylcarnitine (C4-DC)                   | 0,96 | 0,861 |
| sphingomyelin (d18:1/24:1, d18:2/24:0)*            | 0,96 | 0,863 |
| uracil                                             | 0,96 | 0,893 |
| 5-aminovalerate                                    | 0,96 | 0,947 |
| N6-methyllysine                                    | 0,96 | 0,954 |
| stearoyl sphingomyelin (d18:1/18:0)                | 0,96 | 0,954 |
| 1-methylhistidine                                  | 0,96 | 0,958 |
| arabonate/xylonate                                 | 0,96 | 0,970 |
| 2,3-dihydroxy-5-methylthio-4-pentenoate (DMTPA)*   | 0,96 | 0,987 |
| carboxyethyl-GABA                                  | 0,96 | 0,990 |
| N-acetylmethionine sulfoxide                       | 0,95 | 0,691 |
| trimethylamine N-oxide                             | 0,95 | 0,764 |
| glycine                                            | 0,95 | 0,766 |
| N-acetylcysteine                                   | 0,95 | 0,839 |
| sulfate*                                           | 0,95 | 0,844 |
| N-acetylasparagine                                 | 0,95 | 0,880 |
| methionine sulfone                                 | 0,95 | 0,990 |
| stearoyl ethanolamide                              | 0,94 | 0,563 |
| 1-palmitoyl-GPC (16:0)                             | 0,94 | 0,568 |
| thiamin diphosphate                                | 0,94 | 0,637 |
| pyruvate                                           | 0,94 | 0,679 |
| 7-methylguanine                                    | 0,94 | 0,730 |
| benzoylcarnitine*                                  | 0,94 | 0,739 |
| pyridoxine (Vitamin B6)                            | 0,94 | 0,779 |
| trans-4-hydroxyproline                             | 0,94 | 0,797 |
| N-acetylthreonine                                  | 0,94 | 0,799 |
| 4-cholesten-3-one                                  | 0,94 | 0,818 |
| gamma-glutamylglutamine                            | 0,94 | 0,849 |
| xanthine                                           | 0,94 | 0,852 |
| ethylmalonate                                      | 0,94 | 0,871 |
| O-sulfo-L-tyrosine                                 | 0,94 | 0,893 |
| ceramide (d18:1/17:0, d17:1/18:0)*                 | 0,93 | 0,590 |
| 2-aminoadipate                                     | 0,93 | 0,595 |
| kynurenine                                         | 0,93 | 0,654 |
| 3-hydroxyhexanoate                                 | 0,93 | 0,671 |
| p-cresol sulfate                                   | 0,93 | 0,688 |
| uridine 5'-diphosphate (UDP)                       | 0,93 | 0,700 |
| 3'-dephosphocoenzyme A                             | 0,93 | 0,701 |
| ornithine                                          | 0,93 | 0,751 |
| sphingomyelin (d18:1/17:0, d17:1/18:0, d19:1/16:0) | 0,93 | 0,761 |
| 1-dihomo-linolenylglycerol (20:3)                  | 0,93 | 0,764 |

|                                             |      |       |
|---------------------------------------------|------|-------|
| gamma-glutamylvaline                        | 0,93 | 0,790 |
| betaine                                     | 0,93 | 0,814 |
| 3-sulfo-L-alanine                           | 0,93 | 0,835 |
| N-acetyl-glucosamine 1-phosphate            | 0,93 | 0,846 |
| adenosine 3',5'-cyclic monophosphate (cAMP) | 0,93 | 0,892 |
| urate                                       | 0,93 | 0,914 |
| mannonate*                                  | 0,93 | 0,933 |
| UDP-glucuronate                             | 0,93 | 0,961 |
| sphingomyelin (d18:2/14:0, d18:1/14:1)*     | 0,92 | 0,482 |
| sphingomyelin (d17:2/16:0, d18:2/15:0)*     | 0,92 | 0,508 |
| adenosine 5'-monophosphate (AMP)            | 0,92 | 0,543 |
| N-acetyl-aspartyl-glutamate (NAAG)          | 0,92 | 0,613 |
| thiamin monophosphate                       | 0,92 | 0,630 |
| gamma-glutamylleucine                       | 0,92 | 0,655 |
| gamma-glutamylisoleucine*                   | 0,92 | 0,722 |
| sphingomyelin (d18:1/18:1, d18:2/18:0)      | 0,92 | 0,764 |
| gamma-glutamyltyrosine                      | 0,92 | 0,771 |
| argininate*                                 | 0,92 | 0,864 |
| 1-methyl-4-imidazoleacetate                 | 0,92 | 0,895 |
| coenzyme A                                  | 0,91 | 0,412 |
| 1-carboxyethyltyrosine                      | 0,91 | 0,417 |
| homocysteine                                | 0,91 | 0,539 |
| cysteine                                    | 0,91 | 0,542 |
| ribulonate/xylulonate/lyxonate*             | 0,91 | 0,566 |
| N-stearoyl-sphinganine (d18:0/18:0)*        | 0,91 | 0,591 |
| methylphosphate                             | 0,91 | 0,595 |
| 4-methylcatechol sulfate                    | 0,91 | 0,616 |
| cystathionine                               | 0,91 | 0,621 |
| 2'-O-methylcytidine                         | 0,91 | 0,644 |
| gamma-glutamylhistidine                     | 0,91 | 0,657 |
| palmitoylcholine                            | 0,91 | 0,669 |
| phosphopantetheine                          | 0,91 | 0,694 |
| 1-stearoyl-2-linoleoyl-GPC (18:0/18:2)*     | 0,91 | 0,713 |
| catechol sulfate                            | 0,91 | 0,774 |
| N-acetylvaline                              | 0,91 | 0,774 |
| 5-methylcytidine                            | 0,91 | 0,787 |
| pyroglutamine*                              | 0,91 | 0,800 |
| 5-oxoproline                                | 0,91 | 0,872 |
| myristoylcarnitine (C14)                    | 0,90 | 0,534 |

|                                                     |      |       |
|-----------------------------------------------------|------|-------|
| gamma-glutamylphenylalanine                         | 0,90 | 0,572 |
| palmitoleylcholine                                  | 0,90 | 0,599 |
| glycosyl-N-stearoyl-sphinganine<br>(d18:0/18:0)*    | 0,90 | 0,636 |
| cytidine-5'-diphosphoethanolamine                   | 0,90 | 0,650 |
| phenol sulfate                                      | 0,90 | 0,658 |
| stachydrine                                         | 0,90 | 0,681 |
| glutaryl carnitine (C5-DC)                          | 0,90 | 0,775 |
| xanthosine                                          | 0,90 | 0,853 |
| beta-hydroxyisovalerate                             | 0,90 | 0,854 |
| indolelactate                                       | 0,89 | 0,495 |
| palmitoleoyl carnitine (C16:1)*                     | 0,89 | 0,512 |
| N-acetyl isoleucine                                 | 0,89 | 0,678 |
| N-acetyl glutamine                                  | 0,89 | 0,724 |
| 5-hydroxylysine                                     | 0,89 | 0,795 |
| isovalerate (i5:0)                                  | 0,89 | 0,816 |
| alanyl leucine                                      | 0,89 | 0,823 |
| phenylacetyl glycine                                | 0,89 | 0,971 |
| sphingomyelin (d18:0/20:0,<br>d16:0/22:0)*          | 0,88 | 0,410 |
| behenoyl dihydrosphingomyelin<br>(d18:0/22:0)*      | 0,88 | 0,473 |
| N-acetyl aspartate (NAA)                            | 0,88 | 0,508 |
| 2-hydroxyglutarate                                  | 0,88 | 0,597 |
| 3-(4-hydroxyphenyl)lactate                          | 0,88 | 0,624 |
| arachidoyl carnitine (C20)*                         | 0,88 | 0,694 |
| 3-hydroxyisobutyrate                                | 0,88 | 0,701 |
| desmosterol                                         | 0,88 | 0,734 |
| citrulline                                          | 0,88 | 0,756 |
| adenylosuccinate                                    | 0,88 | 0,779 |
| imidazole lactate                                   | 0,87 | 0,433 |
| sphingomyelin (d18:0/18:0,<br>d19:0/17:0)*          | 0,87 | 0,455 |
| bilirubin (Z,Z)                                     | 0,87 | 0,472 |
| 1-palmitoyl-2-linoleoyl-GPE<br>(16:0/18:2)          | 0,87 | 0,487 |
| S-carboxymethyl-L-cysteine                          | 0,87 | 0,586 |
| gamma-glutamyl-alpha-lysine                         | 0,87 | 0,588 |
| alpha-hydroxyisovalerate                            | 0,87 | 0,595 |
| pseudouridine                                       | 0,87 | 0,624 |
| 3-amino-2-piperidone                                | 0,87 | 0,650 |
| cytidine 5'-monophospho-N-<br>acetylneuraminic acid | 0,87 | 0,681 |
| cysteine s-sulfate                                  | 0,87 | 0,726 |
| arachidonoyl CoA                                    | 0,86 | 0,431 |
| gamma-glutamylcysteine                              | 0,86 | 0,449 |

|                                               |      |       |
|-----------------------------------------------|------|-------|
| riboflavin (Vitamin B2)                       | 0,86 | 0,454 |
| pro-hydroxy-pro                               | 0,86 | 0,475 |
| N-acetylglutamate                             | 0,86 | 0,563 |
| N-acetylarginine                              | 0,86 | 0,579 |
| 2-methylcitrate/homocitrate                   | 0,86 | 0,586 |
| eicosenoylcarnitine (C20:1)*                  | 0,86 | 0,633 |
| propionylcarnitine (C3)                       | 0,86 | 0,641 |
| N,N,N-trimethyl-alanylproline betaine (TMAP)  | 0,85 | 0,253 |
| UDP-N-acetylglucosamine/galactosamine         | 0,85 | 0,402 |
| 3-hydroxydecanoate                            | 0,85 | 0,438 |
| glutamate, gamma-methyl ester                 | 0,85 | 0,524 |
| stearoylcarnitine (C18)                       | 0,85 | 0,536 |
| 2-arachidonoylglycerol (20:4)                 | 0,85 | 0,591 |
| N-acetylphenylalanine                         | 0,85 | 0,658 |
| penicillin G                                  | 0,85 | 0,778 |
| lactate                                       | 0,84 | 0,315 |
| 3-methylhistidine                             | 0,84 | 0,382 |
| N2-acetyllysine                               | 0,84 | 0,484 |
| erucoylcarnitine (C22:1)*                     | 0,84 | 0,565 |
| N-acetylhistidine                             | 0,84 | 0,620 |
| oleoyl-arachidonoyl-glycerol (18:1/20:4) [2]* | 0,83 | 0,339 |
| oleoylcholine                                 | 0,83 | 0,382 |
| UDP-galactose                                 | 0,83 | 0,389 |
| arachidonoylcholine                           | 0,83 | 0,423 |
| mannitol/sorbitol                             | 0,83 | 0,423 |
| homoarginine                                  | 0,83 | 0,456 |
| histidylalanine                               | 0,83 | 0,501 |
| 1-stearoyl-GPC (18:0)                         | 0,83 | 0,502 |
| 3-hydroxybutyroylglycine**                    | 0,83 | 0,586 |
| acetylcarnitine (C2)                          | 0,82 | 0,415 |
| phenylalanylalanine                           | 0,82 | 0,481 |
| N-acetylglucosamine 6-phosphate               | 0,82 | 0,504 |
| isoleucylhydroxyproline*                      | 0,82 | 0,512 |
| 1-meadoylglycerol (20:3n9)*                   | 0,82 | 0,555 |
| adenosine                                     | 0,81 | 0,330 |
| hippurate                                     | 0,81 | 0,358 |
| valylleucine                                  | 0,81 | 0,404 |
| N-delta-acetylornithine                       | 0,81 | 0,462 |
| gamma-glutamylglycine                         | 0,81 | 0,482 |
| 5-methyltetrahydrofolate (5MeTHF)             | 0,81 | 0,498 |
| 2-oleoylglycerol (18:1)                       | 0,81 | 0,500 |

|                                                  |      |       |
|--------------------------------------------------|------|-------|
| N-acetyltyrosine                                 | 0,81 | 0,524 |
| retinol (Vitamin A)                              | 0,80 | 0,160 |
| palmitoyl-arachidonoyl-glycerol (16:0/20:4) [2]* | 0,80 | 0,277 |
| 2-hydroxybutyrate/2-hydroxyisobutyrate           | 0,80 | 0,354 |
| cysteinylglycine disulfide*                      | 0,80 | 0,364 |
| S-(3-hydroxypropyl)mercapturic acid (HPMA)       | 0,80 | 0,499 |
| 1,2-dilinoeoyl-GPE (18:2/18:2)*                  | 0,80 | 0,558 |
| 5,6-dihydrouridine                               | 0,79 | 0,262 |
| homostachydrine*                                 | 0,79 | 0,400 |
| valylglutamine                                   | 0,79 | 0,553 |
| linoleoylcholine*                                | 0,78 | 0,376 |
| 3-methoxytyrosine                                | 0,77 | 0,236 |
| dimethylglycine                                  | 0,77 | 0,236 |
| S-lactoylglutathione                             | 0,77 | 0,328 |
| pyridoxine phosphate                             | 0,77 | 0,348 |
| lanthionine                                      | 0,77 | 0,685 |
| leucylglutamine*                                 | 0,76 | 0,334 |
| leucylglycine                                    | 0,76 | 0,862 |
| 4-ethylphenylsulfate                             | 0,75 | 0,383 |
| lysylleucine                                     | 0,75 | 0,979 |
| stearoyl-arachidonoyl-glycerol (18:0/20:4) [2]*  | 0,74 | 0,267 |
| betaine aldehyde                                 | 0,74 | 0,403 |
| 3-hydroxylaurate                                 | 0,73 | 0,107 |
| threonylphenylalanine                            | 0,73 | 0,223 |
| 2-docosahexaenoylglycerol (22:6)*                | 0,73 | 0,316 |
| 3-hydroxybutyrate (BHBA)                         | 0,72 | 0,135 |
| threonate                                        | 0,72 | 0,204 |
| N2-acetyl,N6-methyllysine                        | 0,72 | 0,212 |
| 3-aminoisobutyrate                               | 0,72 | 0,235 |
| N-acetyltryptophan                               | 0,72 | 0,710 |
| quinolate                                        | 0,71 | 0,152 |
| erythritol                                       | 0,70 | 0,236 |
| guaiacol sulfate                                 | 0,70 | 0,345 |
| 2-hydroxyhippurate (salicylurate)                | 0,68 | 0,173 |
| N-methyl-GABA                                    | 0,67 | 0,028 |
| gamma-glutamylcitrulline*                        | 0,67 | 0,486 |
| 4-acetamidobutanoate                             | 0,66 | 0,012 |
| cystine                                          | 0,63 | 0,382 |
| taurocholate                                     | 0,60 | 0,087 |
| 1-linoleoyl-GPC (18:2)                           | 0,59 | 0,504 |
| arabitol/xylitol                                 | 0,58 | 0,053 |



|                                |      |       |
|--------------------------------|------|-------|
| laurylcarnitine (C12)          | 0,58 | 0,253 |
| 3-hydroxyhippurate             | 0,55 | 0,059 |
| 1-oleoylglycerol (18:1)        | 0,50 | 0,037 |
| leucylalanine                  | 0,48 | 0,085 |
| myristoleoylcarnitine (C14:1)* | 0,17 | 0,176 |
